# Supplementary material for: Chemical modification of poly(vinyl chloride) for blood and cellular biocompatibility
Source: Royal Society of Chemistry journal article supplement (doi:10.1039/c5ra03362d), 2015-01-01
Supplement: c5ra03362d1.pdf [file c5ra03362d1.pdf]

## Supplementary Information-

### $^1\text{H}$ NMR spectra of the PVC resins:

All proton nuclear magnetic resonance ( $^1\text{H}$  NMR) spectra were recorded on a JEOL AL300 FTNMR (300 MHz) at room temperature in deuterated DMSO and  $\text{CDCl}_3$  as the solvents and references.

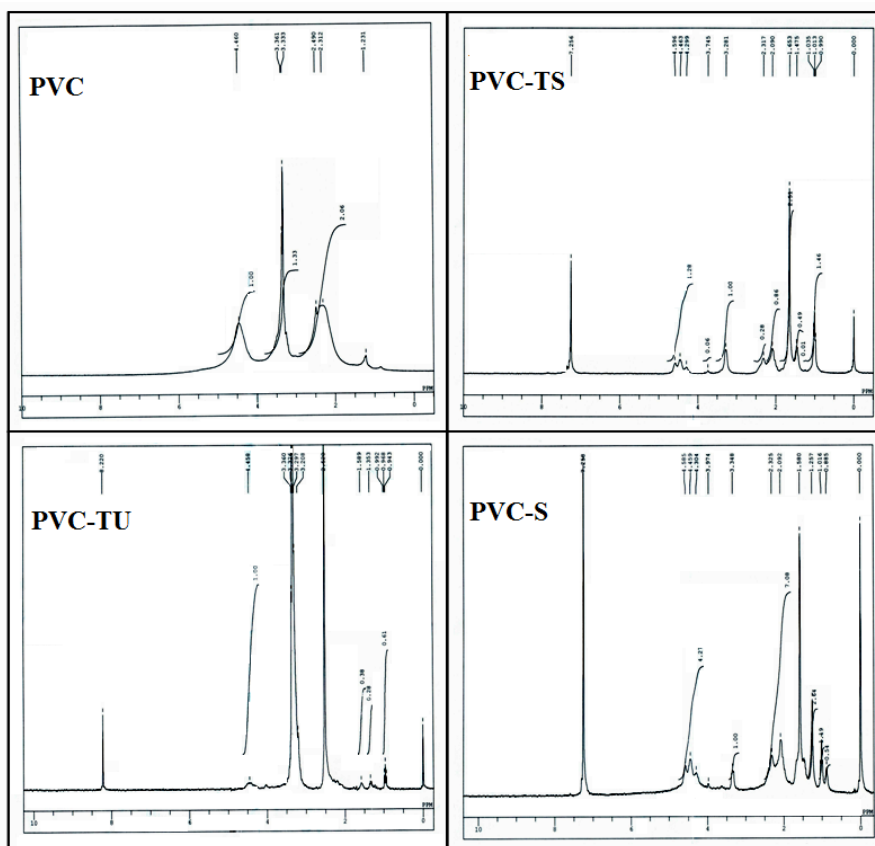

**Figure-1:**  $^1\text{H}$ -NMR spectra of PVC and functionalized PVC with thiosulphate (PVC-TS), thiourea (PVC-TU) and sulphite (PVC-S).

- (1) **PVC-**  $^1\text{H}$  NMR (in DMSO):  $\delta = 1.30$  (s, 3H),  $\delta = 3.34$  (d, 2H),  $\delta = 4.46$  (s, H) [indicative of pure PVC]
- (2) **PVC-TS-**  $^1\text{H}$  NMR (in  $\text{CDCl}_3$ ):  $\delta = 1.01$  (t, 3H),  $\delta = 1.65, 1.47$  (d,  $\text{H}_2\text{O}$  present in  $\text{CDCl}_3$ ),  $\delta = 2.32$  (symmetric),  $2.09$  (anti-symmetric) (d, 2H,  $\text{CH}_2\text{CCl}$ ),  $\delta = 3.75, 3.28$  (s, 1H, HCS),  $\delta = 4.29, 4.59$  (due to presence of hydrogen bonding),  $\delta = 4.46$  (s, H-C-Cl),  $\delta = 7.25$  (solvent) [indicative of PVC modified with  $\text{S}_2\text{O}_3^{2-}$ ]
- (3) **PVC-TU-**  $^1\text{H}$  NMR (in DMSO):  $\delta = 0.96$  (t, 3H,  $\text{CH}_3$ ),  $\delta = 1.35, 1.58$  (m,  $\text{CH}_2$ ),  $\delta = 3.21$  (m, 2H,  $\text{HC-SNH}_2$ ),  $\delta = 4.46$  (s, H-C-Cl),  $\delta = 8.22$  (s,  $\text{NH}_2$ ) [indicative of PVC modified with  $\text{CSNH}_2$ ]

(4) **PVC-S**-  $^1\text{H}$  NMR (in  $\text{CDCl}_3$ ) :  $\delta = 1.01$  (t, 3H),  $\delta = 1.25$  (m,  $\text{CH}_2\text{CH}_3$ ),  $\delta = 1.58$  (s,  $\text{H}_2\text{O}$  present in  $\text{CDCl}_3$ ),  $\delta = 2.32$  (symmetric),  $2.09$  (anti-symmetric) (d, 2H,  $\text{CH}_2\text{CCl}$ ),  $\delta = 3.97$  (s, 1H, HCS),  $\delta = 4.30$ ,  $4.58$  (due to presence of hydrogen bonding),  $\delta = 4.459$  (s, H-C-Cl),  $\delta = 7.25$  (solvent) [indicative of PVC modified with  $\text{SO}_3^{2-}$ ]

The signal of the CH-Cl protons at 4.46 ppm decreases with conversion, while new one at 3.75, 3.28 and 3.97 ppm is formed due to CH-S protons in PVC-TS and PVC-S respectively.
